# Supplementary material for: Simplistic approach to formulate an ionophore-based membrane and its study for nitrite ion sensing
Source: Royal Society of Chemistry journal article supplement (doi:10.1039/d4ra04590d), 2024-01-01
Supplement: d4ra04590d1.pdf [file d4ra04590d1.pdf]

## Simplistic Approach to Formulate an Ionophore based Membrane and its Study for Nitrite Ion Sensing

Chandrashekhar M Ghorpade, Govind G Umarji, Rohit A Hanamsagar, Sudhir S Arbuj, Manish D Shinde and Sunit B Rane\*

*Additive Manufacturing & Advanced Materials Electronics & Energy (AM2E2) Division,  
Centre for Materials for Electronics Technology, off Pashan Road, Panchawati, Pune-411008.*

Corresponding author Email: [sunit@cmet.gov.in](mailto:sunit@cmet.gov.in)

### Supporting information

#### S1. Membrane thickness measurement data

Table T1- Membrane (M1) thickness measurement

| Sr.No | Membrane code | Several thickness measurement (mm) | Average thickness (mm) |
|-------|---------------|------------------------------------|------------------------|
| 1     | M1            | 1] 0.230<br>2] 0.235<br>3] 0.240   | 0.235                  |

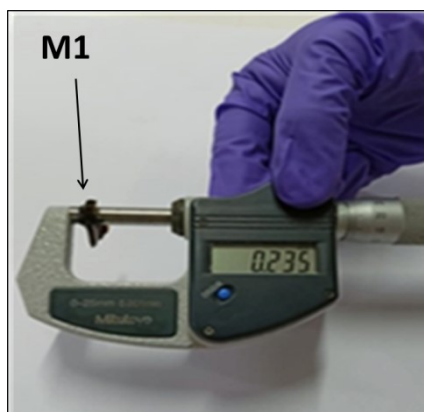

Fig S1. Membrane thickness measurement by micrometer screw gauge

#### S2. FTIR Spectra

The individual FTIR spectra for CI, 2-NPOE, HTAB and PVC

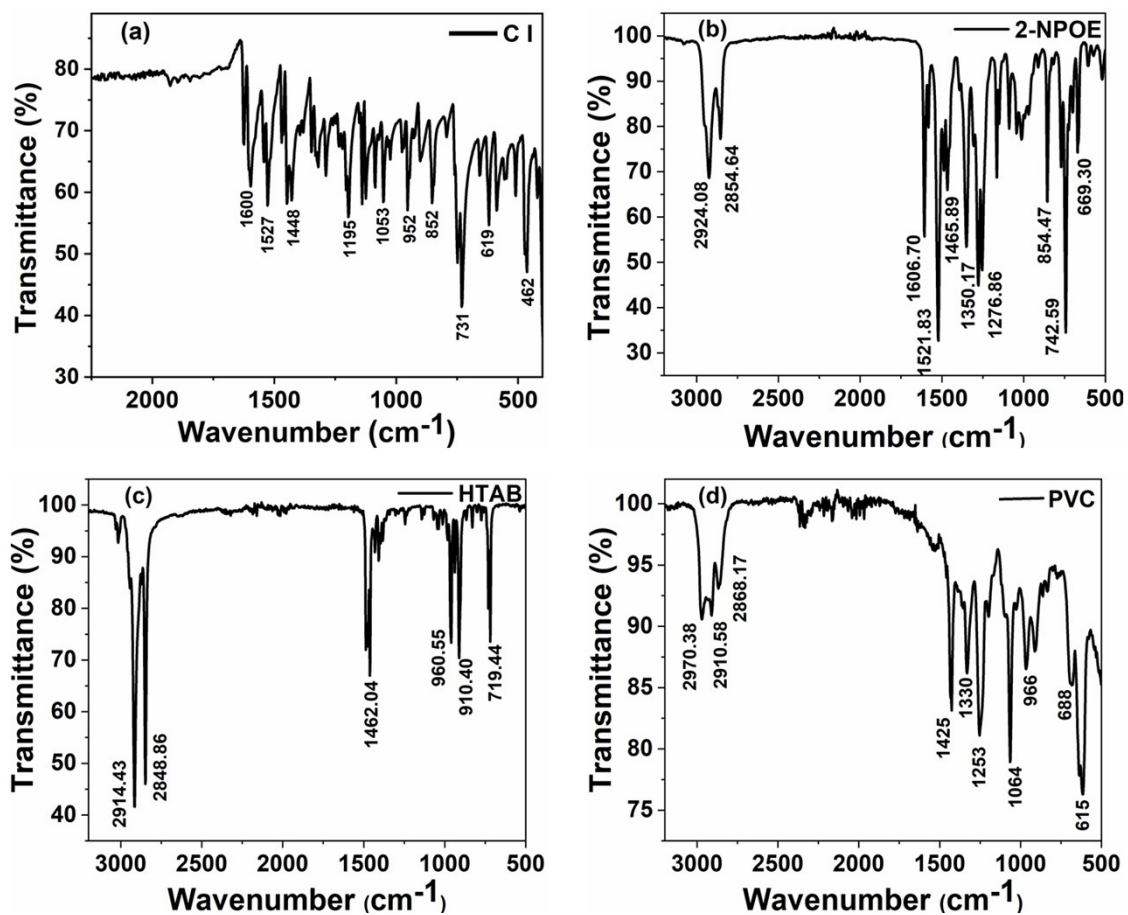

**Fig.S2.** FTIR spectrum (3250-500  $\text{cm}^{-1}$ ) for **(a)** CI, **(b)** 2-NPOE, **(c)** HTAB and **(d)** High molecular weight PVC.

### S3. Optical Microscopy

The individual optical images of the CI, PVC and HTAB

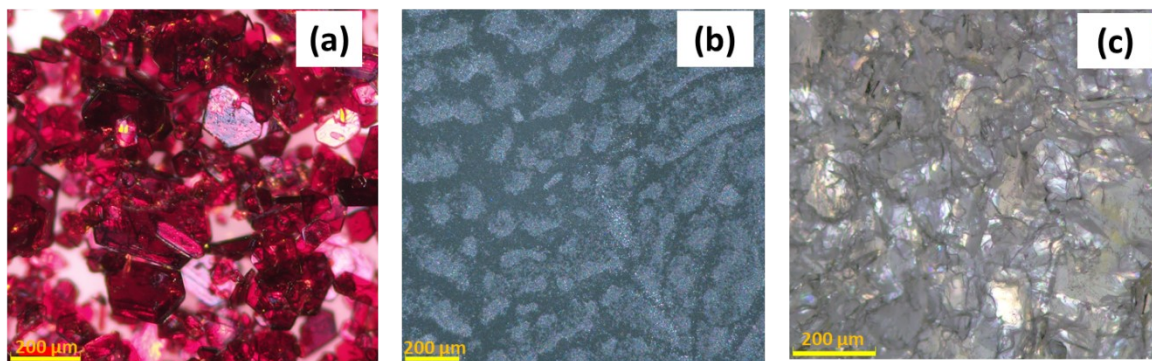

**Fig.S3.** Optical microscope Images of **(a)** CI, **(b)** High molecular weight PVC, and **(c)** HTAB.
